# Supplementary material
Source: PubMed Central journal article supplement (PMC2650120)
Supplement: 0813200106_0813200106SI.pdf [file 0813200106_0813200106SI.pdf]

# Supporting Information

Oh et al. 10.1073/pnas.0813200106

## SI Materials and Methods

**Cell Counting and Viability Test.** A coulter particle counter (Beckman Coulter; Z-1 model) was used to count the hMSCs for maintenance and experimental plating densities. To measure live cell elongation at various time points, a fluorescein diacetate (FDA; Sigma) staining was conducted. Cells were plated onto the specimen at a density of  $1 \times 10^4$  cells per mL. At 2 and 24 h after plating, the cells on the substrate of the specimen were washed by  $1 \times$  PBS, stained by FDA in PBS ( $10 \mu\text{L}/10 \text{ mL}$ ), incubated for  $\approx 30$  s, and washed once more.

**Immunofluorescence of Fibronectin.** After 2 h of incubation in cell culture media or control  $\text{H}_2\text{O}$  with out the presence of cells, Ti and  $\text{TiO}_2$  nanotube substrates were fixed in 4% paraformaldehyde in  $1 \times$  PBS for 15 min at room temperature. Once fixed, substrates were washed twice with  $1 \times$  wash buffer ( $1 \times$  PBS containing 0.05% Tween-20). Then the samples were incubated

for 1 h at room temperature in 5% gelatin (Sigma, from fish skin)/ $1 \times$  PBS followed by the addition of primary anti-BSA antibody (1:100, 2A3E6, Santa Cruz Biotechnology)/anti-bovine serum fibronectin antibody (1:1,000; Primary antibody for staining fibronectin was R457 rabbit polyclonal anti-rat antiserum against the amino-terminal 70-kDa fragment of fibronectin). The samples were incubated overnight at  $4^\circ\text{C}$ . After incubation, substrates were washed three times for 5 min each wash with  $1 \times$  wash buffer. Goat anti-mouse IgG-FITC (1:1,000, Santa Cruz Biotechnology) and goat anti-rabbit IgG Alexa Fluor 594 (1:1,000, Invitrogen) in  $1 \times$  PBS was added for double staining and the substrates were incubated again for 1 h at room temperature. After incubation, substrates were washed 3 times for 5 min each wash with  $1 \times$  wash buffer. The samples were then inverted onto coverslips, mounted, visualized, and photographed by an epifluorescence microscope (DM IRB, Leica Microsystems).

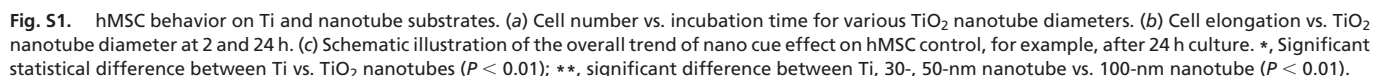

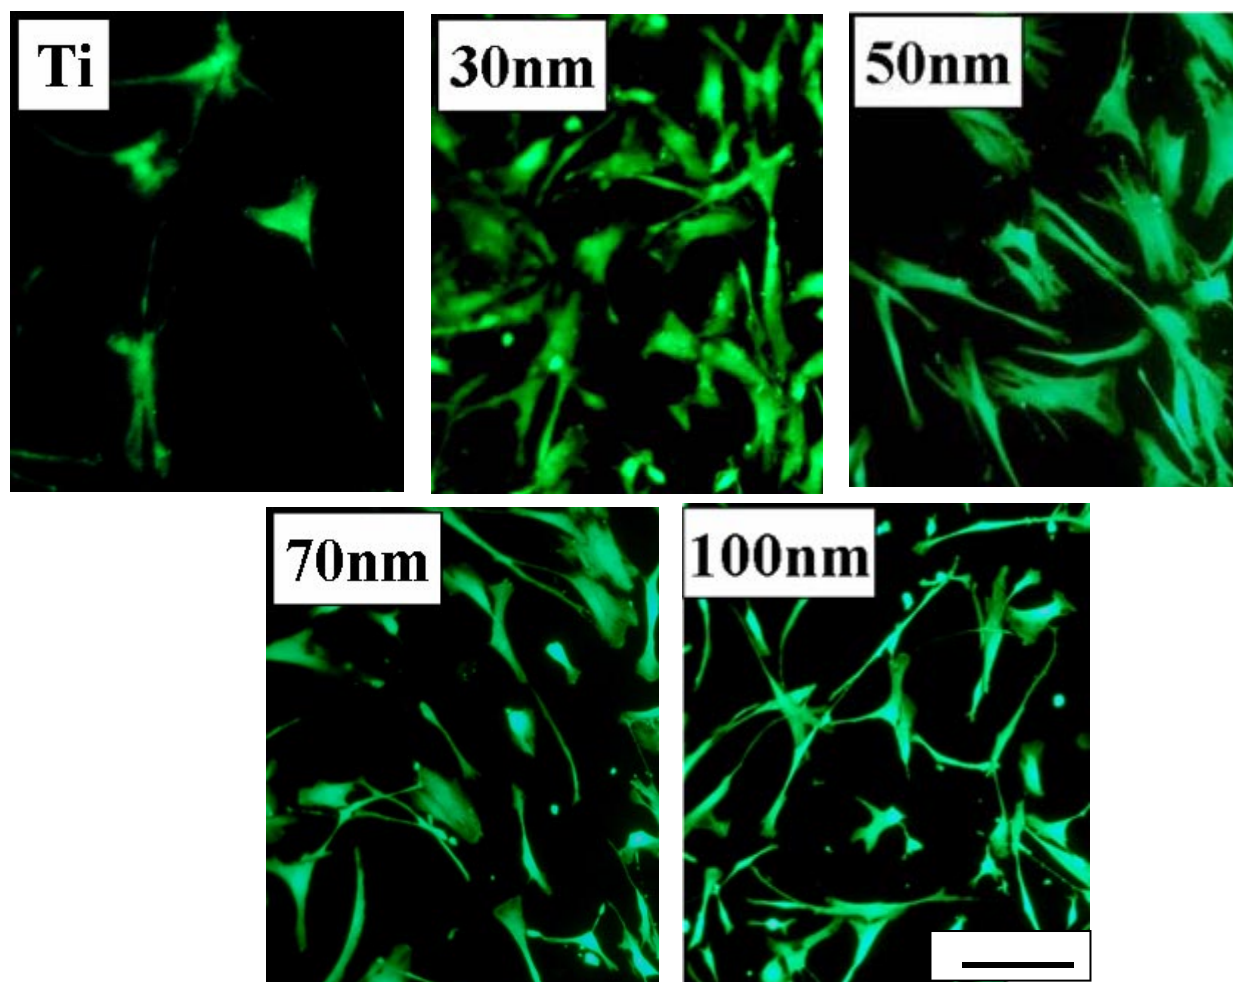

**Fig. S2.** Fluorescein diacetate (FDA) images of human mesenchymal stem cells (hMSCs) on flat Ti and 30-, 50-, 70-, and 100-nm diameter  $\text{TiO}_2$  nanotube surfaces after 24 h of culture. (Scale bar, 100  $\mu\text{m}$ .)

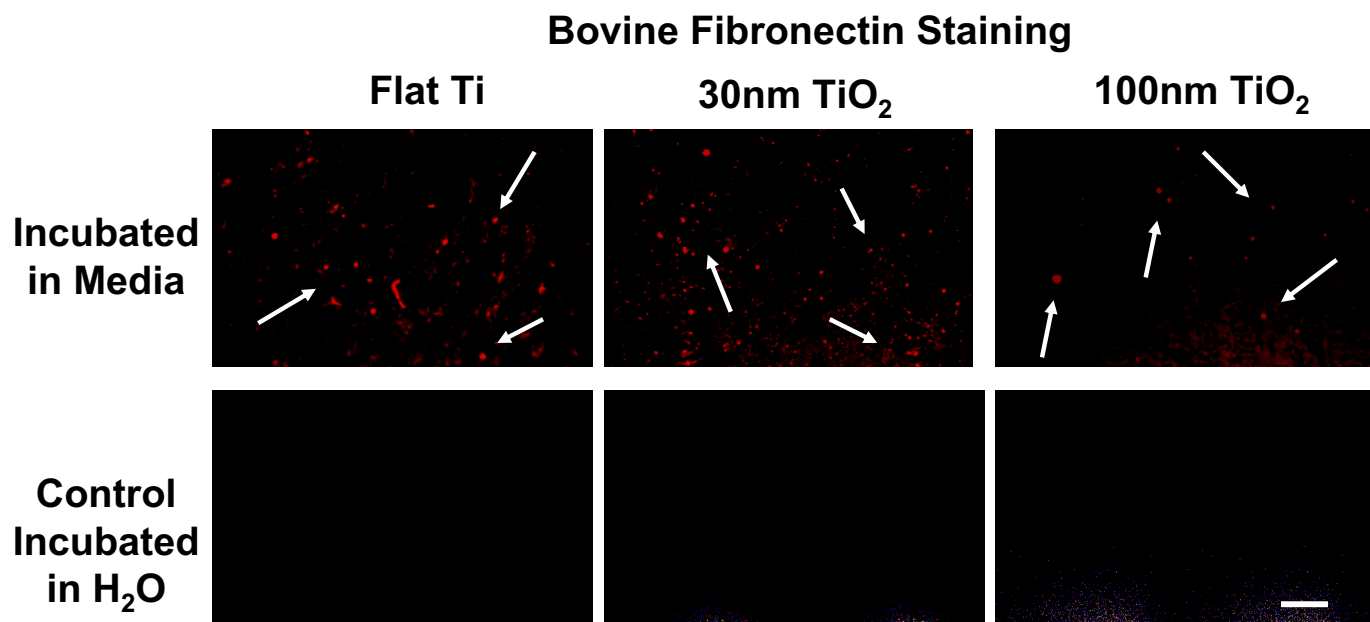

**Fig. S3.** Bovine fibronectin immunofluorescent staining (red) was performed on flat Ti, 30-nm, and 100-nm TiO<sub>2</sub> surfaces to identify the protein particles on the surface. Fibronectin particles were detected on all surfaces that were incubated in media for 2 h. No fibronectin was detected on control surfaces incubated for 2 h in H<sub>2</sub>O. (Scale bar, 20  $\mu$ m.)
